# Supplementary material for: A non‐randomized comparison of engagement and outcomes for in‐person versus virtual delivery of the Partner2Lose weight management trial
Source: PubMed Central journal article supplement — Obes Sci Pract. 2024 Jul 23;10(4):e778. doi: 10.1002/osp4.778 (PMC11265462; doi:10.1002/osp4.778), 2024-07-23
Supplement: OSP4-10-e778-s001.pdf [file OSP4-10-e778-s001.pdf]

**Supporting Information:**

**A non-randomized comparison of engagement and outcomes for in-person versus virtual delivery of the Partner2Lose weight management trial**

Stephanie M. Carpenter, PhD,<sup>1</sup> Armaan Shetty, BS,<sup>2</sup> Scott J. Hetzel, MS,<sup>3</sup> Katya Garza, MS, MPH,<sup>4</sup> Laura S. Porter, PhD,<sup>5</sup> Kristen E. Gray, PhD,<sup>6,7</sup> Ryan J. Shaw, PhD, RN,<sup>8</sup> Megan A. Lewis, PhD,<sup>9</sup> Lu Mao, PhD,<sup>3</sup> Samantha Pabich, MD, MPH,<sup>10,11</sup> Heather M. Johnson, MD, MS,<sup>12</sup> William S. Yancy Jr., MD, MHS,<sup>13</sup> Felix Elwert, PhD,<sup>3,14</sup> Corrine I. Voils, PhD<sup>4,11</sup>

<sup>1</sup> College of Health Solutions, Arizona State University

<sup>2</sup> Department of Clinical and Health Psychology, University of Florida

<sup>3</sup> Department of Biostatistics and Medical Informatics, School of Medicine and Public Health, University of Wisconsin-Madison

<sup>4</sup> Department of Surgery, School of Medicine and Public Health, University of Wisconsin-Madison

<sup>5</sup> Psychiatry & Behavioral Sciences, Duke University School of Medicine

<sup>6</sup> Department of Veterans Affairs Puget Sound Health Care System, Health Services Research & Development

<sup>7</sup> Health Systems and Population Health, School of Public Health, University of Washington

<sup>8</sup> School of Nursing, Duke University

<sup>9</sup> RTI International

<sup>10</sup> Department of Medicine, School of Medicine and Public Health, University of Wisconsin-Madison

<sup>11</sup> William S Middleton Memorial Veterans Hospital

<sup>12</sup> Christine E. Lynn Women's Health & Wellness Institute, Baptist Health South Florida; Charles E. Schmidt College of Medicine, Florida Atlantic University

<sup>13</sup> Department of Medicine, Duke University School of Medicine

<sup>14</sup> Department of Sociology, University of Wisconsin-Madison

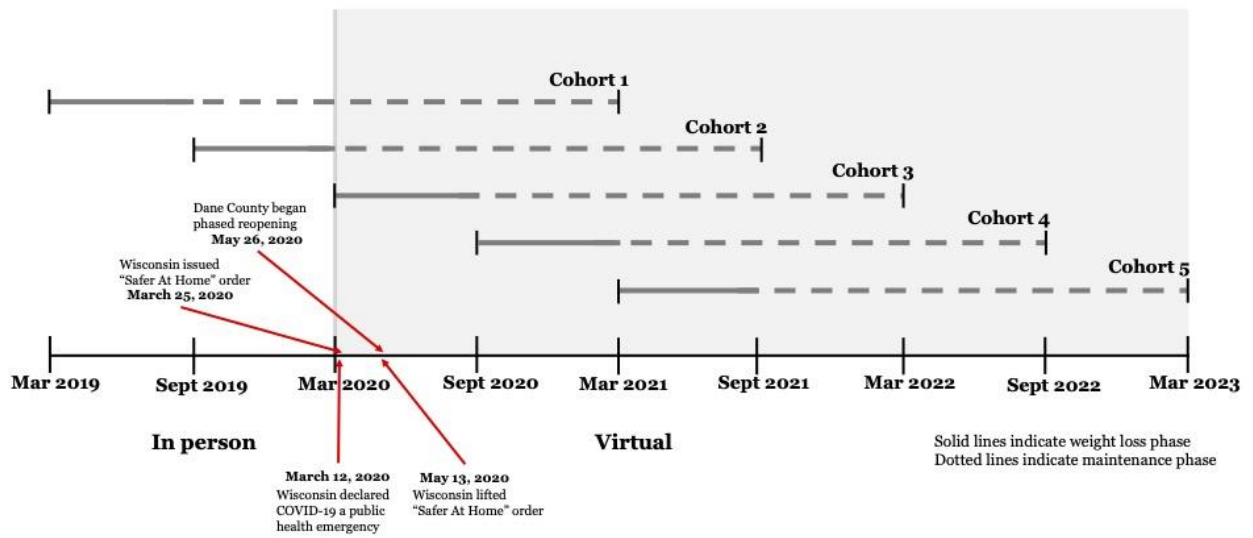

Figure S1. Timeline of cohort participation in the study, including onset of key COVID-19 markers. Solid lines indicate the 6-month weight loss phase and dashed lines indicate the 18-month maintenance phase. Arrows depict the onset of COVID-19 and “safer-at-home” order in the state of Wisconsin, where the study was conducted. Although the state of Wisconsin lifted the “safer-at-home” order on May 13, 2020, Dane County, where the majority of participants were from, did not begin phased reopening until May 26, 2020.

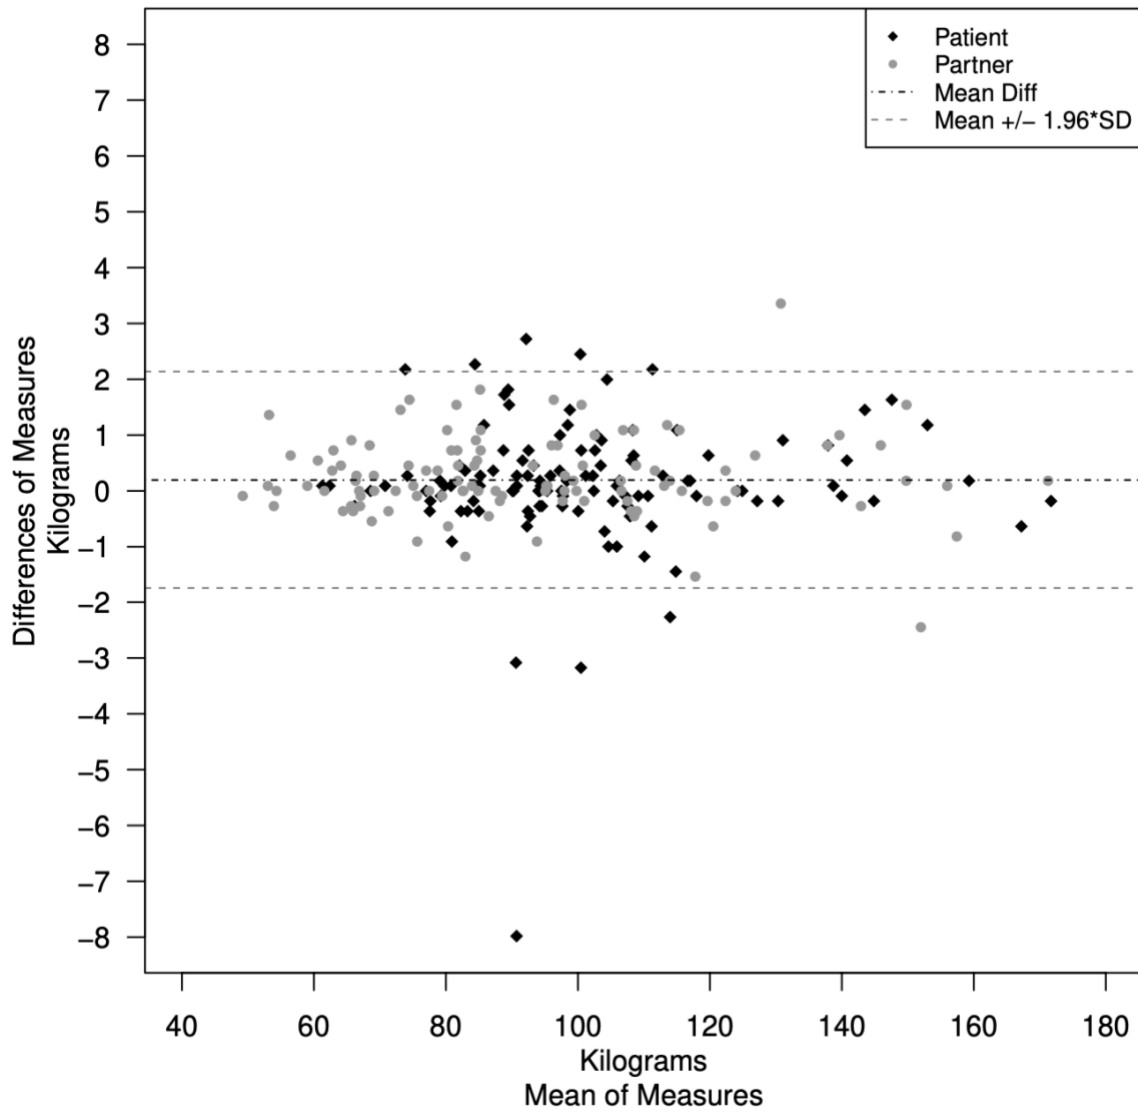

Figure S2. Bland-Altman agreement between weights obtained on the same day in-person by study personnel on a study scale and at home by the participant on a different study-provided scale (N=116). The two methods produced high agreement (average difference [95% CI]: -0.13 [-0.35, 0.08]).

Running Title: ENGAGEMENT IN-PERSON VS VIRTUAL WEIGHT MANAGEMENT

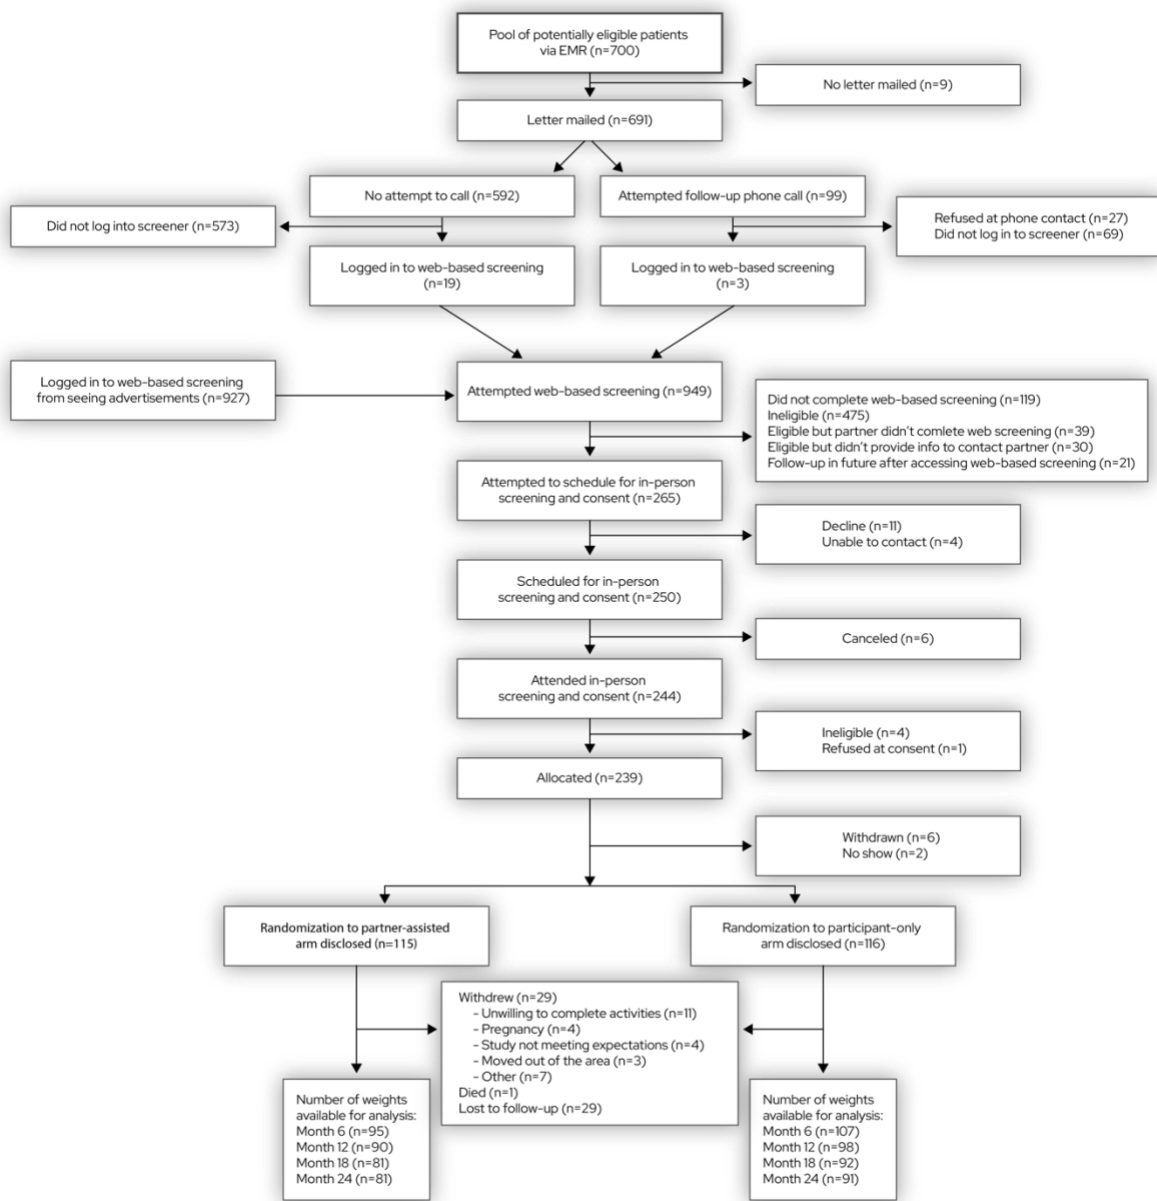

Figure S3. Diagram depicting participant enrollment, assignment, and retention at each stage of the study.

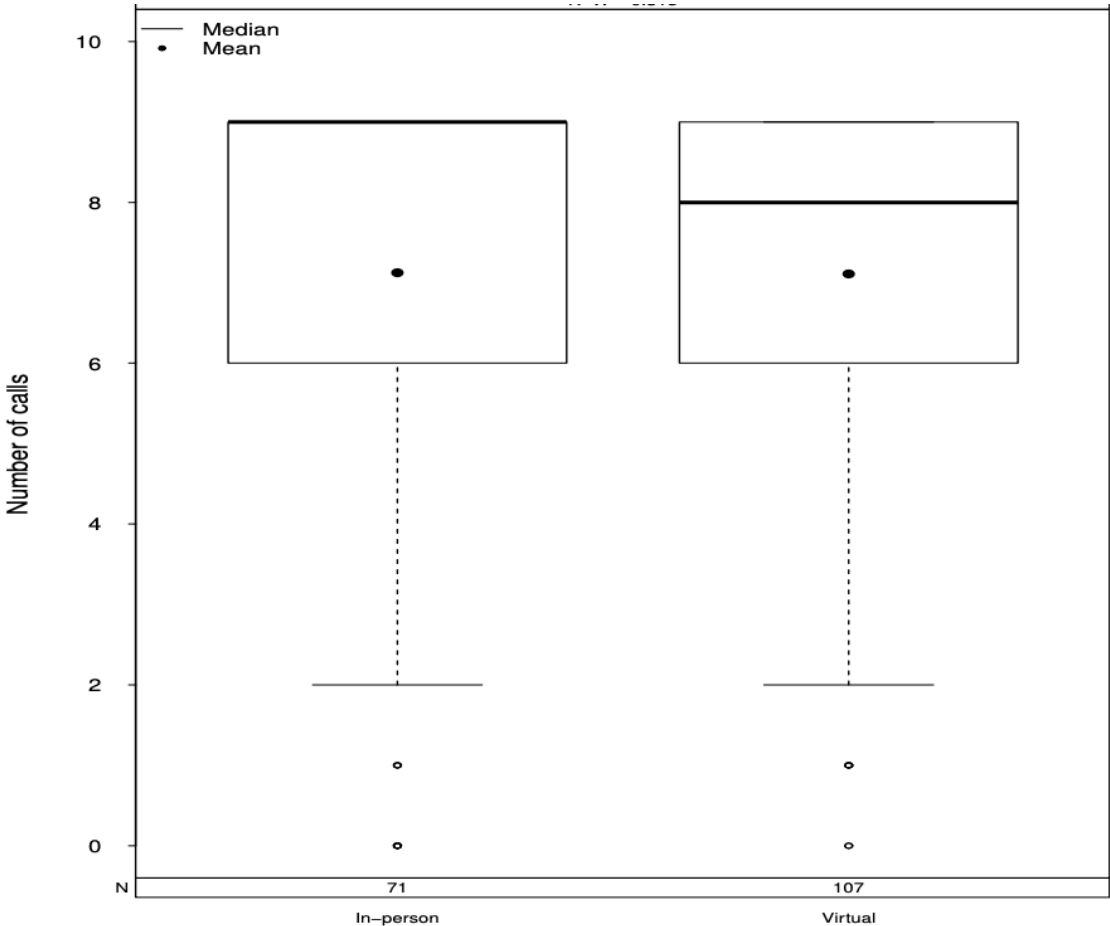

Figure S4. Attendance at individual calls for in-person versus virtual cohorts. Box and whisker plots indicate the median (solid line), mean (dot), and interquartile range (IQR) within the dimensions of the boxes.
